# Supplementary material
Source: PubMed Central journal article supplement (PMC4426884)
Supplement: NIHMS644608-supplement.pdf [file NIHMS644608-supplement.pdf]

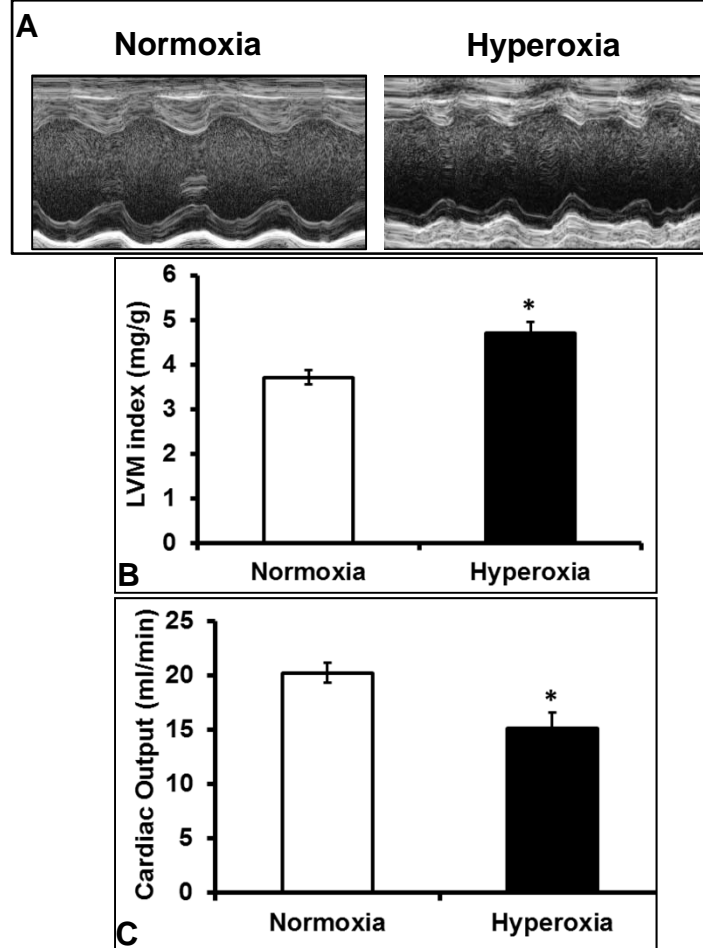

**Figure. S1. Structural and functional assessment of hyperoxia exposed mouse heart.** Echocardiographic measurement of cardiac structure and function (A) representative M-mode images of normoxia and hyperoxia exposed hearts, (B) Cardiac Output and (C) Left ventricular mass (LVM) index. Bars represent mean  $\pm$  SEM,  $n=8$ ,  $*p \leq 0.05$ .

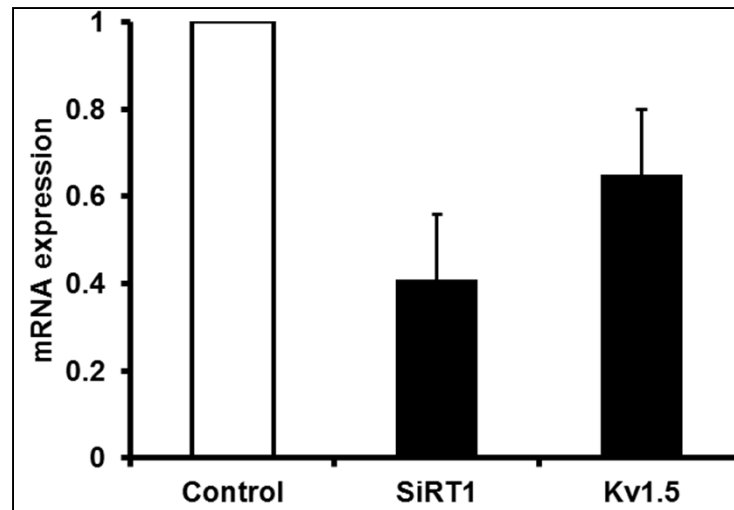

**Figure. S2. SiRT1 knockdown in H9C2 cells:** The cells exposed to SiRT1 siRNA for 24 h showed decreased SiRT1 and Kv1.5 expression compared with control, n=2-4.
